EXPRESSION OF CONCERN

# Expression of Concern: Assessing clinical and morphological features of megalotrichosis induced by Tyrosine kinase inhibitors versus Prostaglandins analogues

## The *PLOS One* Editors

The *PLOS One* Editors issue this Expression of Concern due to issues identified after publication of this article [1] about compliance with data-related requirements specified in the study's ethics approval documentation.

Additionally, the article was republished on January 16, 2025, to address an error. Please download this article again to view the correct version.

The article's Data Availability statement is updated to: All relevant data are within the paper and its Supporting Information files.

## Supporting information

**S1 Table. Clinical and morphological features of MT patients.**  
(XLSX)

## Reference

1. Gershon R, Vishnevskia-Dai V. Assessing clinical and morphological features of megalotrichosis induced by Tyrosine kinase inhibitors versus Prostaglandins analogues. *PLoS ONE*. 2024;19(12):e0313326. <https://doi.org/10.1371/journal.pone.0313326> PMID: [39739702](https://pubmed.ncbi.nlm.nih.gov/39739702/)

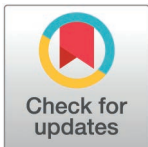

## OPEN ACCESS

**Citation:** The *PLOS One* Editors (2025) Expression of Concern: Assessing clinical and morphological features of megalotrichosis induced by Tyrosine kinase inhibitors versus Prostaglandins analogues. *PLoS ONE* 20(3): e0320533. <https://doi.org/10.1371/journal.pone.0320533>

**Published:** March 7, 2025

**Copyright:** © 2025 The *PLOS One* Editors. This is an open access article distributed under the terms of the [Creative Commons Attribution License](https://creativecommons.org/licenses/by/4.0/), which permits unrestricted use, distribution, and reproduction in any medium, provided the original author and source are credited.
